# Supplementary material for: Chitosan, Polyethylene Glycol and Polyvinyl Alcohol Modified MgFe2O4 Ferrite Magnetic Nanoparticles in Doxorubicin Delivery: A Comparative Study In Vitro
Source: MDPI journal article supplement (doi:10.3390/molecules26133893), 2021-06-25
Supplement: s1 [file s1]

# Chitosan, Polyethylene glycol and Polyvinyl Alcohol Modified $\text{MgFe}_2\text{O}_4$ Ferrite Magnetic Nanoparticles in Doxorubicin Delivery: A comparative Study In Vitro

Deevak Ramnandan, Seipati Mokhosi, Aliscia Daniels and Moganavelli Singh \*

Nano-Gene and Drug Delivery Group, Discipline of Biochemistry, University of KwaZulu-Natal, Private Bag X54001, Durban, South Africa; deevaksyn@gmail.com (D.R.); MOKHOSIS@ukzn.ac.za (S.M.); DanielsA@ukzn.ac.za (A.D.)

\* Correspondence: singhm1@ukzn.ac.za; Tel.: +27-31-2607170

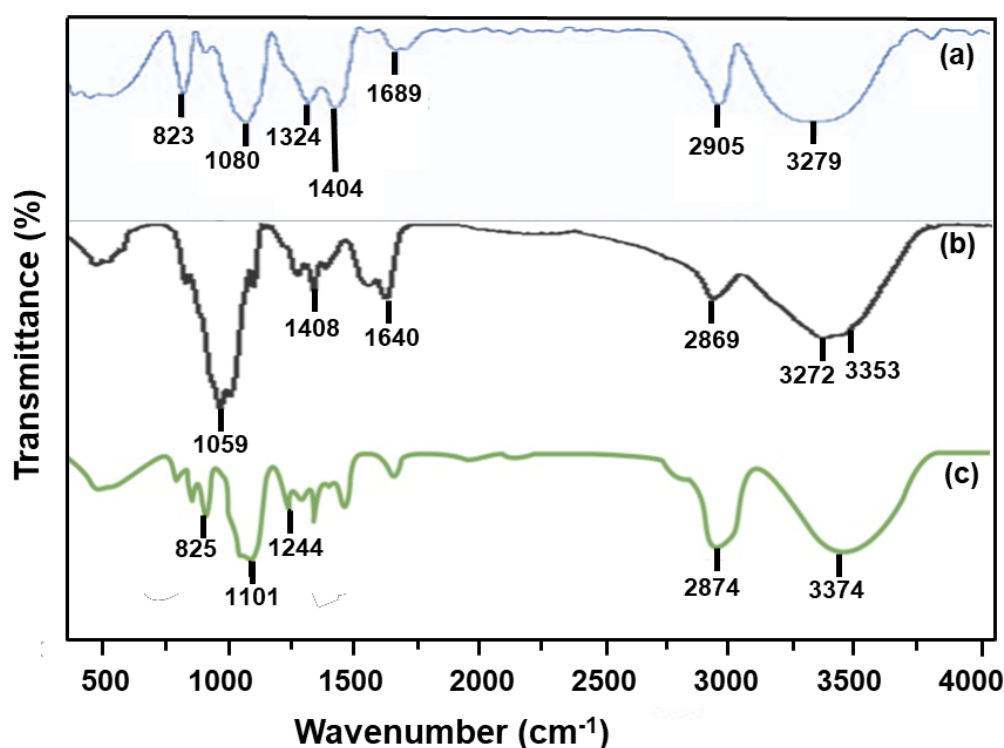

**Figure S1.** FTIR spectra of (a) Polyvinyl alcohol, (b) Chitosan and (c) Polyethylene glycol

**Table S1.** Effect of pH and temperature on the size and stability of the DOX-CHI-MgFe<sub>2</sub>O<sub>4</sub> nanocomplexes.

|        | Size (nm)   | Zeta Potential (mV) |
|--------|-------------|---------------------|
| pH 4.5 | 120.9 ± 5.9 | -5.1 ± 0.8          |
| pH 6.5 | 80.3 ± 2.8  | -13.1 ± 1.5         |
| pH 7.4 | 79.9 ± 18.1 | -13.5 ± 2.5         |
| 4 °C   | 85.6 ± 10.4 | -9.4 ± 1.1          |
| 25 °C  | 80.1 ± 7.5  | 14.7 ± 0.5          |

**Table S2.** Effect of pH and temperature on the size and stability of the DOX-PVA-MgFe<sub>2</sub>O<sub>4</sub> nanocomplexes.

|        | Size (nm)    | Zeta Potential (mV) |
|--------|--------------|---------------------|
| pH 4.5 | 135.6 ± 20.8 | -11.5 ± 6.8         |
| pH 6.5 | 111.3 ± 15.7 | -20.4 ± 3.7         |
| pH 7.4 | 98.4 ± 34.8  | -11.2 ± 0.1         |
| 4 °C   | 62.0 ± 1.2   | - 14.5 ± 2.8        |
| 25 °C  | 77.0 ± 29.7  | - 10.6 ± 0.2        |

**Table S3.** Effect of pH and temperature on the size and stability of the DOX-PEG-MgFe<sub>2</sub>O<sub>4</sub> nanocomplexes.

|        | Size (nm)    | Zeta Potential (mV) |
|--------|--------------|---------------------|
| pH 4.5 | 104.6 ± 19.2 | 4.4 ± 0.4           |
| pH 6.5 | 95.3 ± 9.3   | - 14.7 ± 0.2        |
| pH 7.4 | 80.4 ± 4.6   | -15.3 ± 5.4         |
| 4 °C   | 123.8 ± 20.7 | -4.4 ± 1.4          |
| 25 °C  | 82.6 ± 9.2   | - 12.6 ± 4.7        |
